# Supplementary material for: Impact of Total Protein Level and Dysglycaemia on the Efficacy of Clopidogrel in Patients Underwent Carotid Artery Stenosis with CYP2C19 Genetic Variants
Source: Research Square preprint supplement (doi:10.21203/rs.3.rs-745056/v1), 2021-07-30
Supplement: Supplementary file 2 [file 730c83cac8600dc591206eee.docx]

|  | **MACCEs** | **Non-MACCEs** | **P** |
| --- | --- | --- | --- |
| **Conservative treatment group (%) (n = 138)** | 20 (14.49) | 118 (85.51) | 0.148 |
| **Cerebral artery stent group (%) (n = 164)** | 15 (9.15) | 149 (90.85) |  |

**Supplementary Table 1. The MACCEs in conservative treatment group and in cerebral artery stent group**
